# Supplementary material for: Genetic diversity and networks of exchange: a combined approach to assess intra-breed diversity
Source: PubMed Central journal article supplement (PMC3406966; doi:10.1186/1297-9686-44-17), 2012-05-23
Supplement: 1297-9686-44-17-S2.pdf [file 1297-9686-44-17-S2.pdf]

### MLB

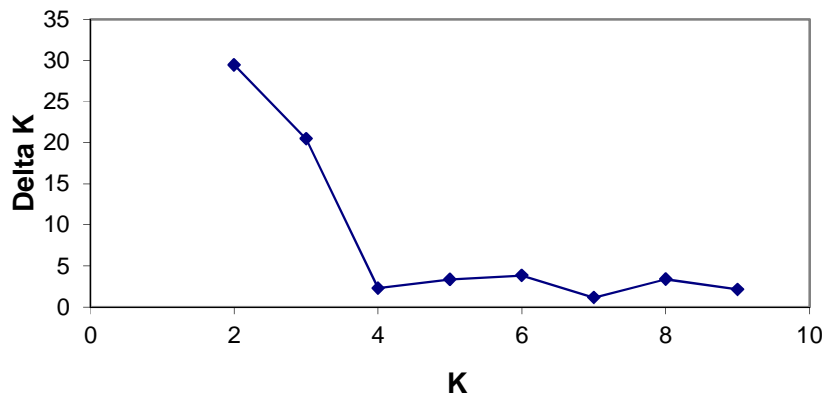

### ESM

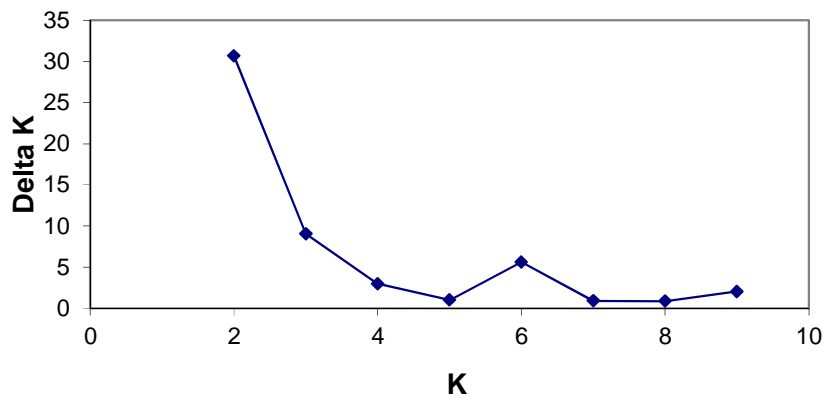

### AR

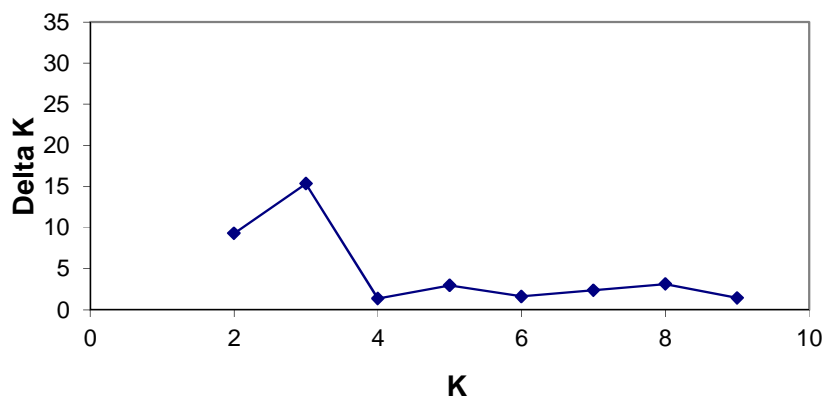

#### Relation between Delta K and the number of clusters K for each breed

Delta K =  $\frac{\text{mean} [|L(K+1)-2L(K)+L(K-1)|]}{\text{standard deviation}[L(K)]}$  where  $L(K)$  is the log probability of data.
