# Supplementary material for: Genetic diversity and networks of exchange: a combined approach to assess intra-breed diversity
Source: PubMed Central journal article supplement (PMC3406966; doi:10.1186/1297-9686-44-17), 2012-05-23
Supplement: 1297-9686-44-17-S5.pdf [file 1297-9686-44-17-S5.pdf]

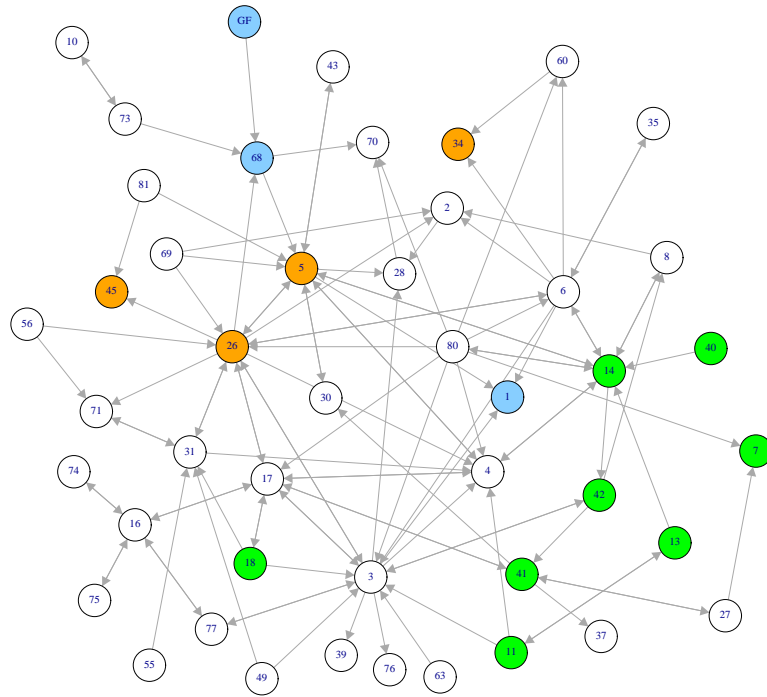

**Representation of the directed network of exchanges of MLB animals**

Each number represents a herd. Blue circles: herds of the genetic group including animals from the Friesian and Zealand breeds; green circles: herds of the genetic group G1; orange circles: herds of the genetic group G2.
