# Supplementary material for: Genetic diversity and networks of exchange: a combined approach to assess intra-breed diversity
Source: PubMed Central journal article supplement (PMC3406966; doi:10.1186/1297-9686-44-17), 2012-05-23
Supplement: 1297-9686-44-17-S6.pdf [file 1297-9686-44-17-S6.pdf]

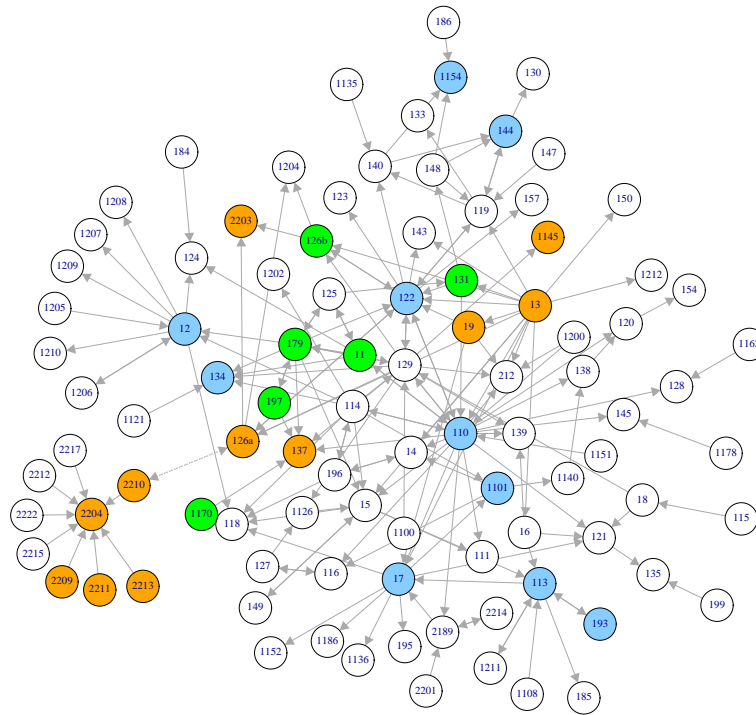

**Representation of the directed network of exchanges of AR animals**

Each number represents a herd. Green circles: herds of the genetic group G1; blue circles: herds of the genetic group G2; orange circles: herds of the genetic group G3; dotted edge: link between the small network and the other herds corresponding to the smallest Reynolds' distance between herds of the small network and the other herds.
