# Supplementary material for: Genetic diversity and networks of exchange: a combined approach to assess intra-breed diversity
Source: PubMed Central journal article supplement (PMC3406966; doi:10.1186/1297-9686-44-17), 2012-05-23
Supplement: 1297-9686-44-17-S7.pdf [file 1297-9686-44-17-S7.pdf]

### Number of herds and exchanges and average degree of networks for each breed

| Network   | Number of herds | Number of exchanges | Average Degree |
|-----------|-----------------|---------------------|----------------|
| ESM       | 8               | 12                  | 3.00           |
| ESM (all) | 20              | 31                  | 3.10           |
| MLB       | 17              | 28                  | 3.29           |
| MLB (all) | 46              | 85                  | 3.70           |
| AR        | 17              | 32                  | 3.76           |
| AR (all)  | 84              | 137                 | 3.26           |

Herds with at least five sampled animals and all herds with identified exchanges (“all”) are both considered.
